# Supplementary material for: Silk fibroin scaffolds seeded with Wharton’s jelly mesenchymal stem cells enhance re-epithelialization and reduce formation of scar tissue after cutaneous wound healing
Source: PubMed Central journal article supplement (PMC6487033; doi:10.1186/s13287-019-1229-6), 2019-04-27
Supplement: 13287_2019_1229_MOESM2_ESM.pdf [file 13287_2019_1229_MOESM2_ESM.pdf]

**A**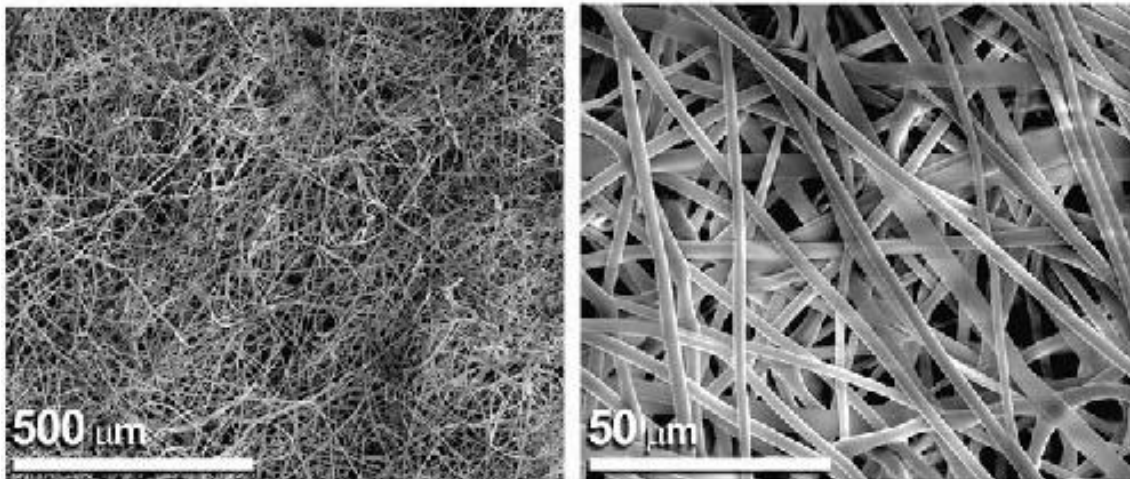**B**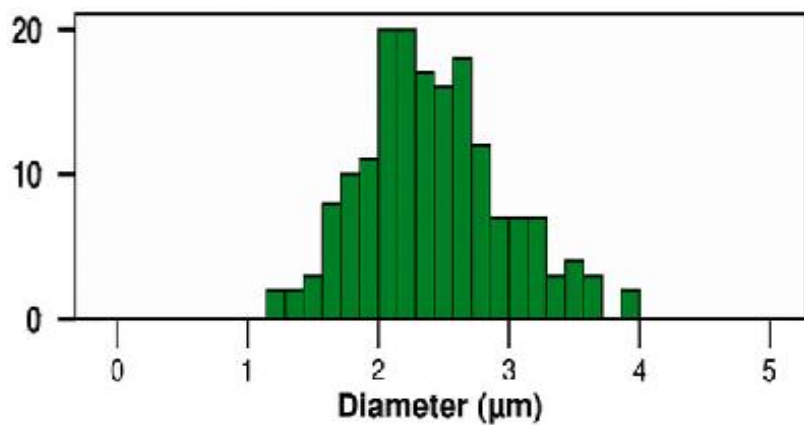**C**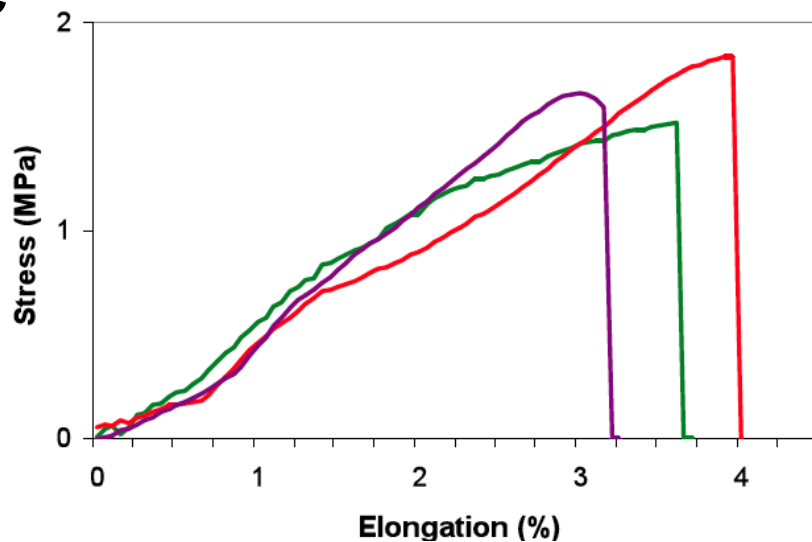

**Fig. S1.** SEM micrographs (**A**), histogram of fiber diameters (**B**) and examples of stress-elongation curves (**C**) of electrospun silk fibroin mats produced with 19% regenerated silk fibroin solutions.
