# Supplementary material for: Silk fibroin scaffolds seeded with Wharton’s jelly mesenchymal stem cells enhance re-epithelialization and reduce formation of scar tissue after cutaneous wound healing
Source: PubMed Central journal article supplement (PMC6487033; doi:10.1186/s13287-019-1229-6), 2019-04-27
Supplement: 13287_2019_1229_MOESM3_ESM.pdf [file 13287_2019_1229_MOESM3_ESM.pdf]

**A****Control**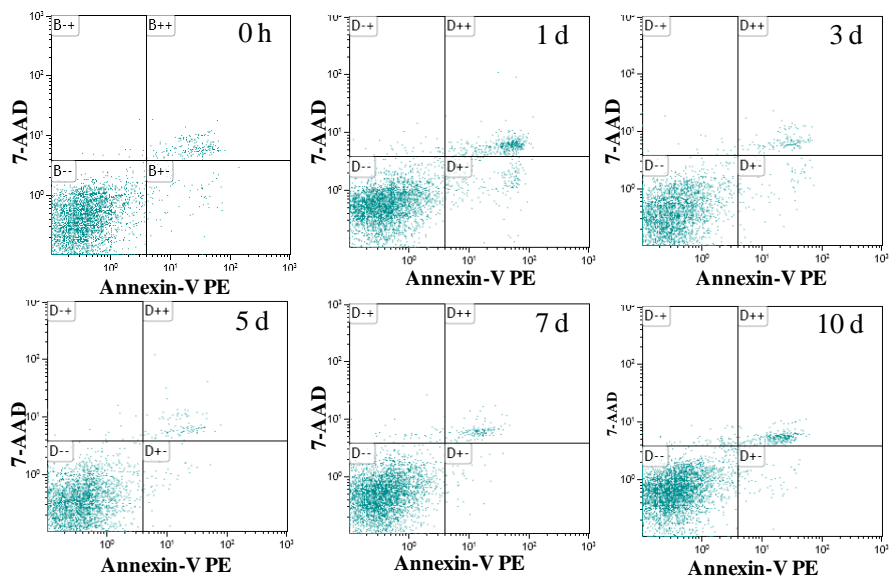**Silk Fibroin**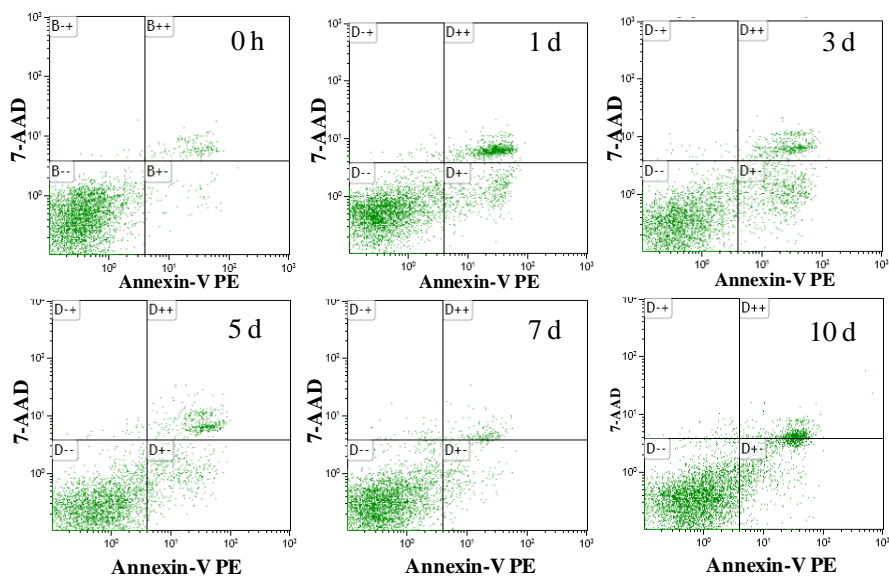**B**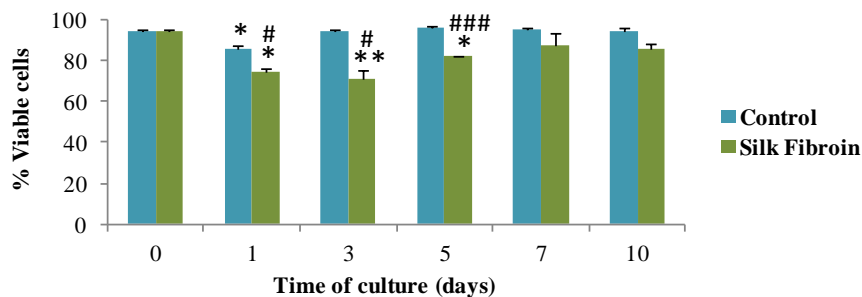

**Fig. S2.** Viability of Wj-MSCs cultured on electrospun SF scaffolds for different times. **(A)** Percentages of Annexin-V/7-AAD<sup>+</sup> cells were analyzed by flow cytometry. **(B)** Percentage of viable cells significantly decreased compared to values obtained at time 0 ( $*p < 0.05$ ,  $**p < 0.01$ ), according to one-way ANOVA. Also, percentages of viable cells significantly decreased after culture on SF patches compared to the control group at each time point ( $#p < 0.05$ ,  $###p < 0.001$ ). Results are shown as mean  $\pm$  SD of three independent experiments performed in triplicates.
