# Supplementary material for: Silk fibroin scaffolds seeded with Wharton’s jelly mesenchymal stem cells enhance re-epithelialization and reduce formation of scar tissue after cutaneous wound healing
Source: PubMed Central journal article supplement (PMC6487033; doi:10.1186/s13287-019-1229-6), 2019-04-27
Supplement: 13287_2019_1229_MOESM4_ESM.pdf [file 13287_2019_1229_MOESM4_ESM.pdf]

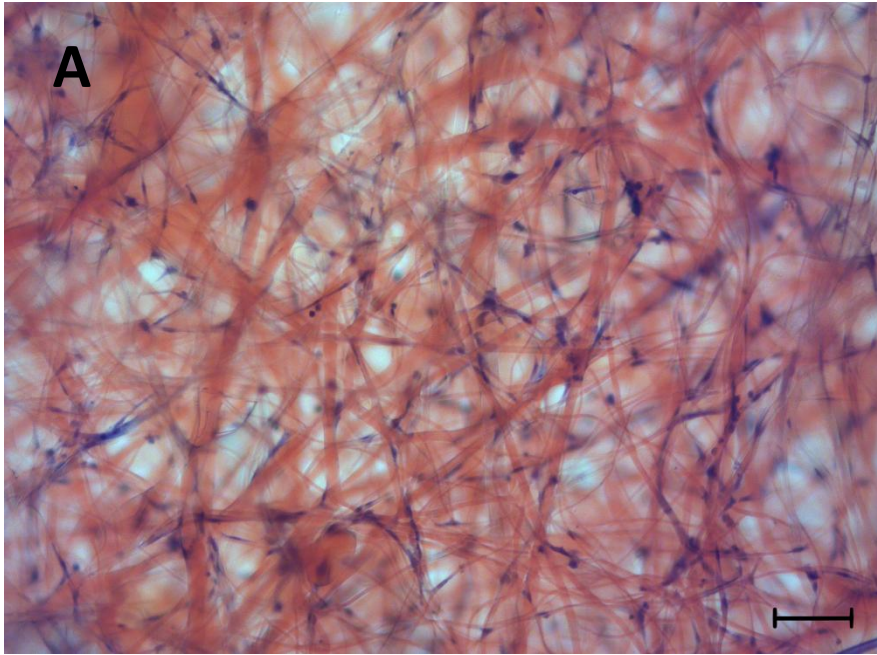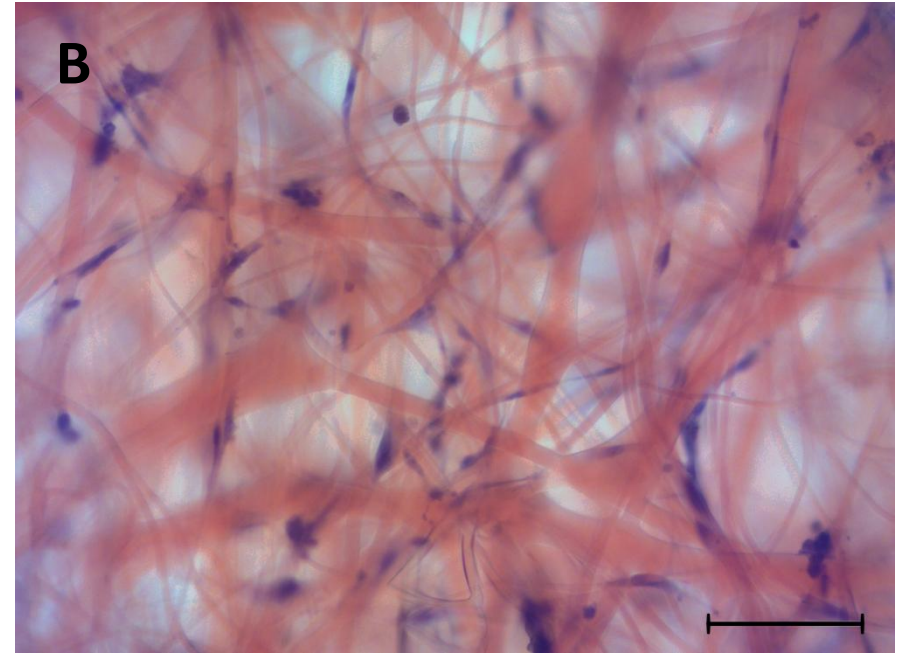

**Fig. S3. Masson's trichrome stain** of electrospun silk fibroin scaffold seeded with Wharton's jelly mesenchymal stem cells at a density of  $5 \times 10^4$  cells/cm<sup>2</sup> for four days. A: 100X magnification. B: 200X magnification. Scale bar: 100  $\mu$ m.
