# Supplementary material for: Silk fibroin scaffolds seeded with Wharton’s jelly mesenchymal stem cells enhance re-epithelialization and reduce formation of scar tissue after cutaneous wound healing
Source: PubMed Central journal article supplement (PMC6487033; doi:10.1186/s13287-019-1229-6), 2019-04-27
Supplement: 13287_2019_1229_MOESM5_ESM.pdf [file 13287_2019_1229_MOESM5_ESM.pdf]

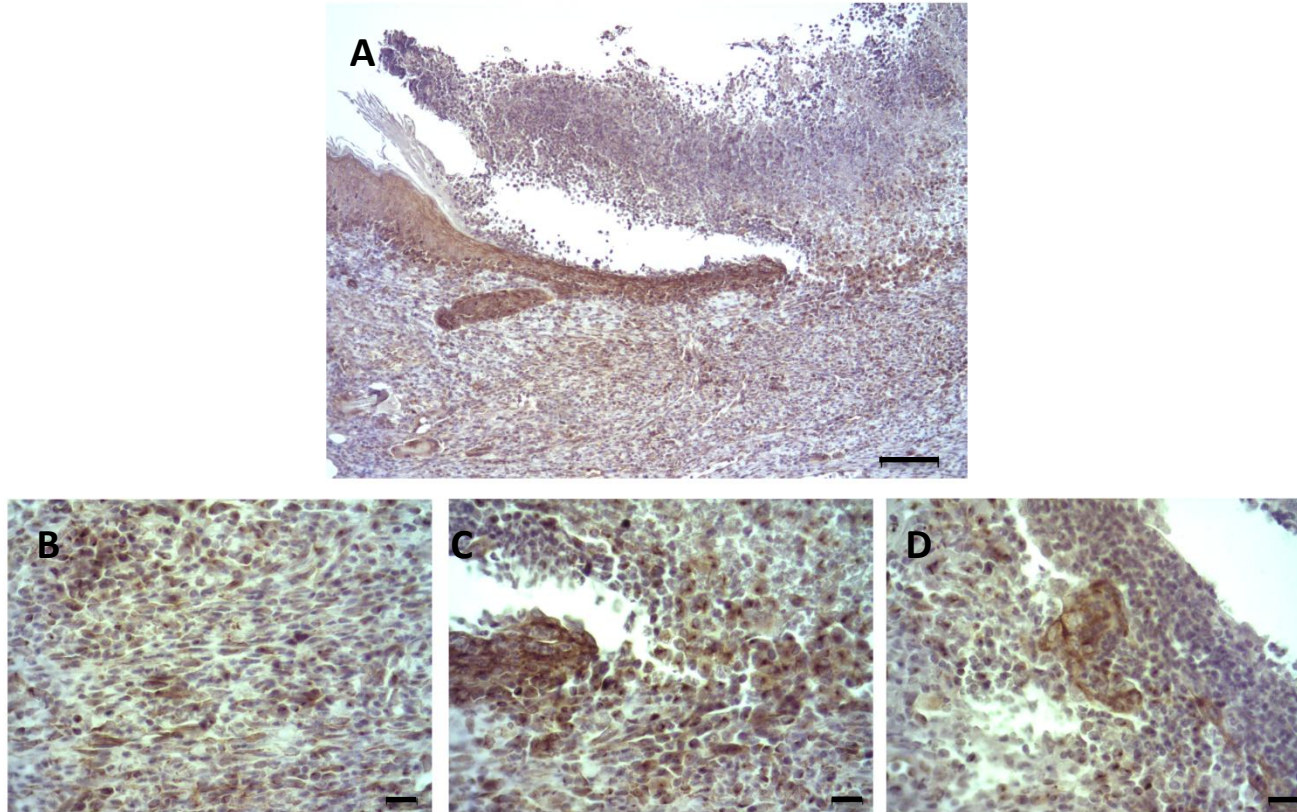

**Fig. S4.** Expression at 2 weeks of the human mesenchymal stem cell marker CD90 at the migrating epithelial front in wounds from mice treated with silk fibroin patches cellularized with Wj-MSCs and Wj-MSCs injected at the edge of the wound. Scale bar: 100  $\mu\text{m}$  (A) and 20  $\mu\text{m}$  (B-D).
