# Supplementary material for: Silk fibroin scaffolds seeded with Wharton’s jelly mesenchymal stem cells enhance re-epithelialization and reduce formation of scar tissue after cutaneous wound healing
Source: PubMed Central journal article supplement (PMC6487033; doi:10.1186/s13287-019-1229-6), 2019-04-27
Supplement: 13287_2019_1229_MOESM6_ESM.pdf [file 13287_2019_1229_MOESM6_ESM.pdf]

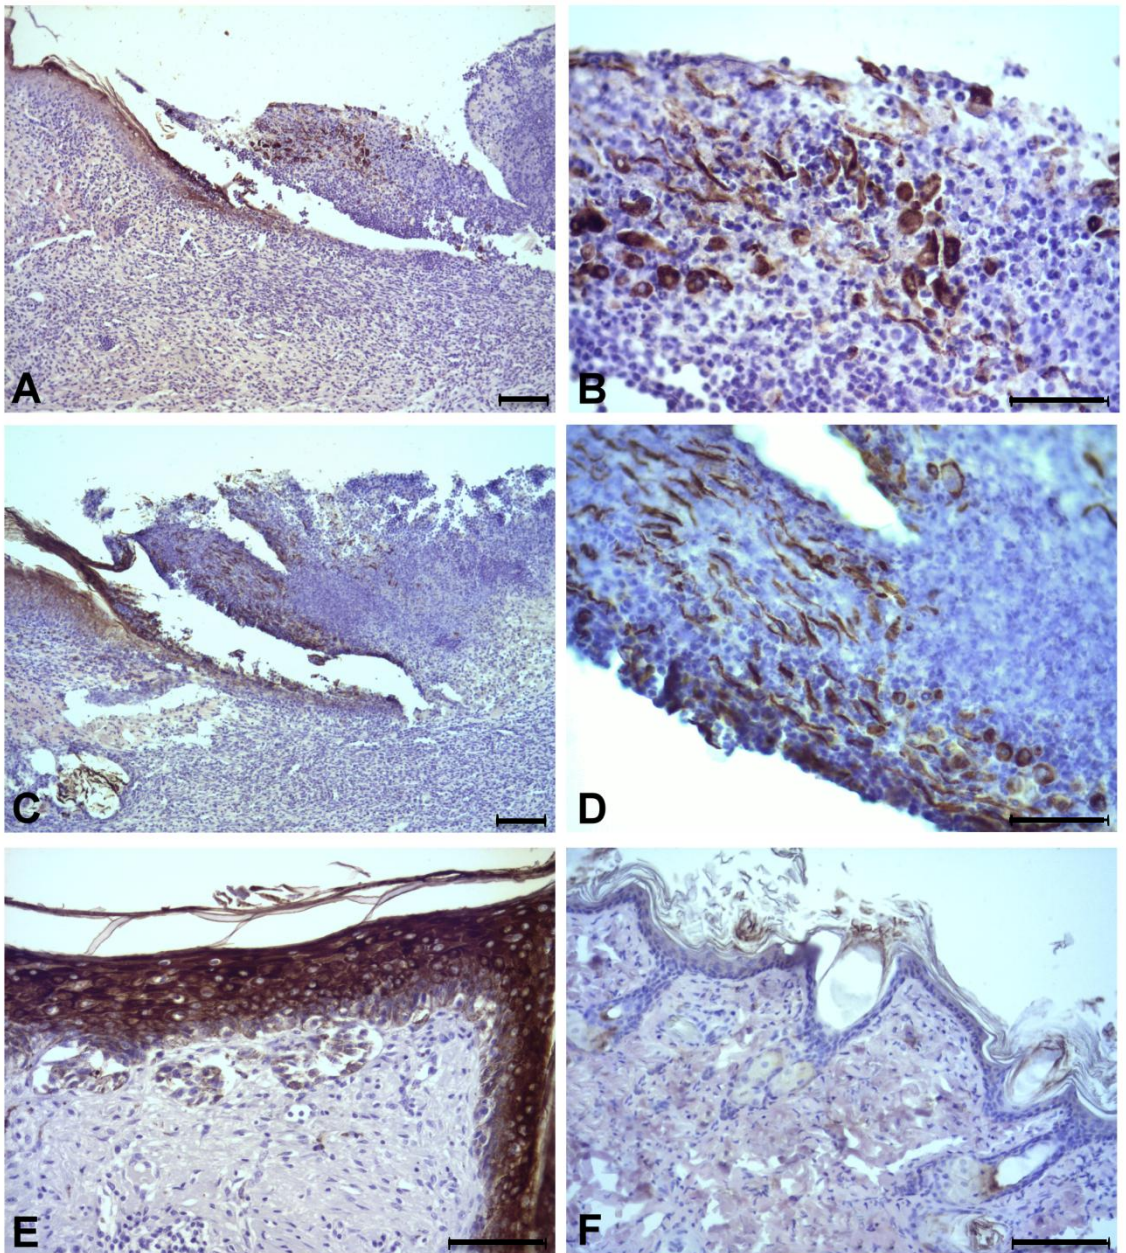

**Fig. S5.** Analysis of transdifferentiation of Wj-MSCs into keratinocyte-like cells. Expression of human pan cytokeratin was analyzed by immunohistochemistry at the migrating epithelial front of wounds from mice after 2 weeks of treatment with silk fibroin patches cellularized with Wj-MSCs plus Wj-MSCs injected at the edge of the wound. Human (E) or mouse (F) skin sections were used as positive and negative controls, respectively. Scale bar: 100  $\mu\text{m}$  (A, C, E, F) and 50  $\mu\text{m}$  (B, D).
