# Supplementary material for: Silk fibroin scaffolds seeded with Wharton’s jelly mesenchymal stem cells enhance re-epithelialization and reduce formation of scar tissue after cutaneous wound healing
Source: PubMed Central journal article supplement (PMC6487033; doi:10.1186/s13287-019-1229-6), 2019-04-27
Supplement: 13287_2019_1229_MOESM7_ESM.pdf [file 13287_2019_1229_MOESM7_ESM.pdf]

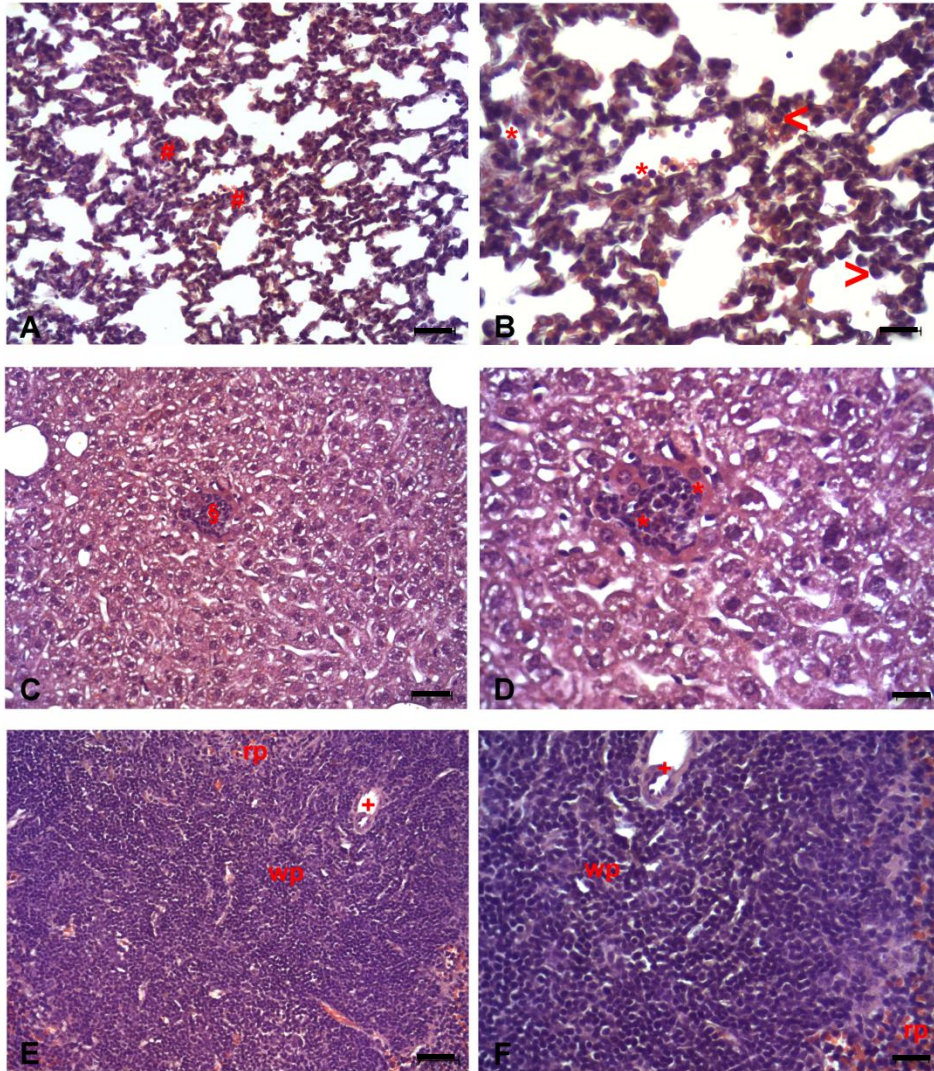

**Fig. S6.** Histopathological findings in lung (A, B), liver (C, D), and spleen (E, F) sections stained by H&E. (A, B) Interstitial inflammatory infiltrate (#), and alveolar macrophages (<) in lung tissue. (C, D) Image of a liver microabscess (§), with polymorphonuclear cells in it (\*). (E, F) Hyperplasia of the splenic white pulp (+: splenic arteriole). Abbreviations: **wp**: white pulp; **rp**: red pulp. Left panels: 20X magnification. Right panels: 40X magnification.
