# Supplementary material for: Silk fibroin scaffolds seeded with Wharton’s jelly mesenchymal stem cells enhance re-epithelialization and reduce formation of scar tissue after cutaneous wound healing
Source: PubMed Central journal article supplement (PMC6487033; doi:10.1186/s13287-019-1229-6), 2019-04-27
Supplement: 13287_2019_1229_MOESM8_ESM.pdf [file 13287_2019_1229_MOESM8_ESM.pdf]

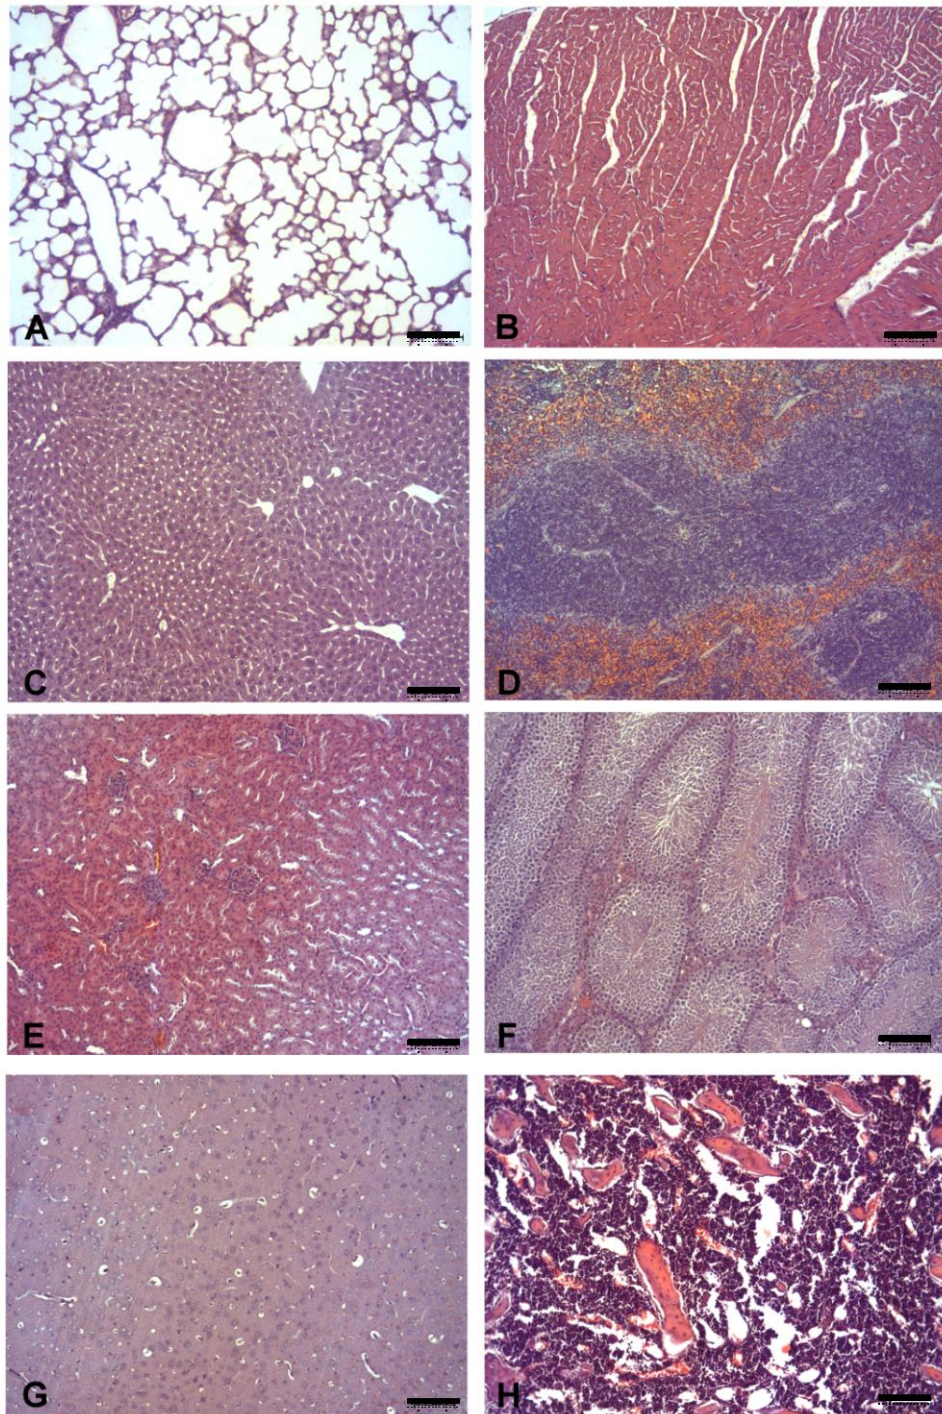

**Fig. S7.** H&E staining for standard histological examination of (A) lungs, (B) heart, (C) liver, (D) spleen, (E) kidney, (F) testis, (G) brain and (H) bone marrow. Scale bar: 50 μm.
